# Supplementary material
Source: HighWire-hosted journal article supplement (https://bmjopen.bmj.com/content/12/4/e053339)
Supplement: inline-supplementary-material-2 [file inline-supplementary-material-2.pdf]

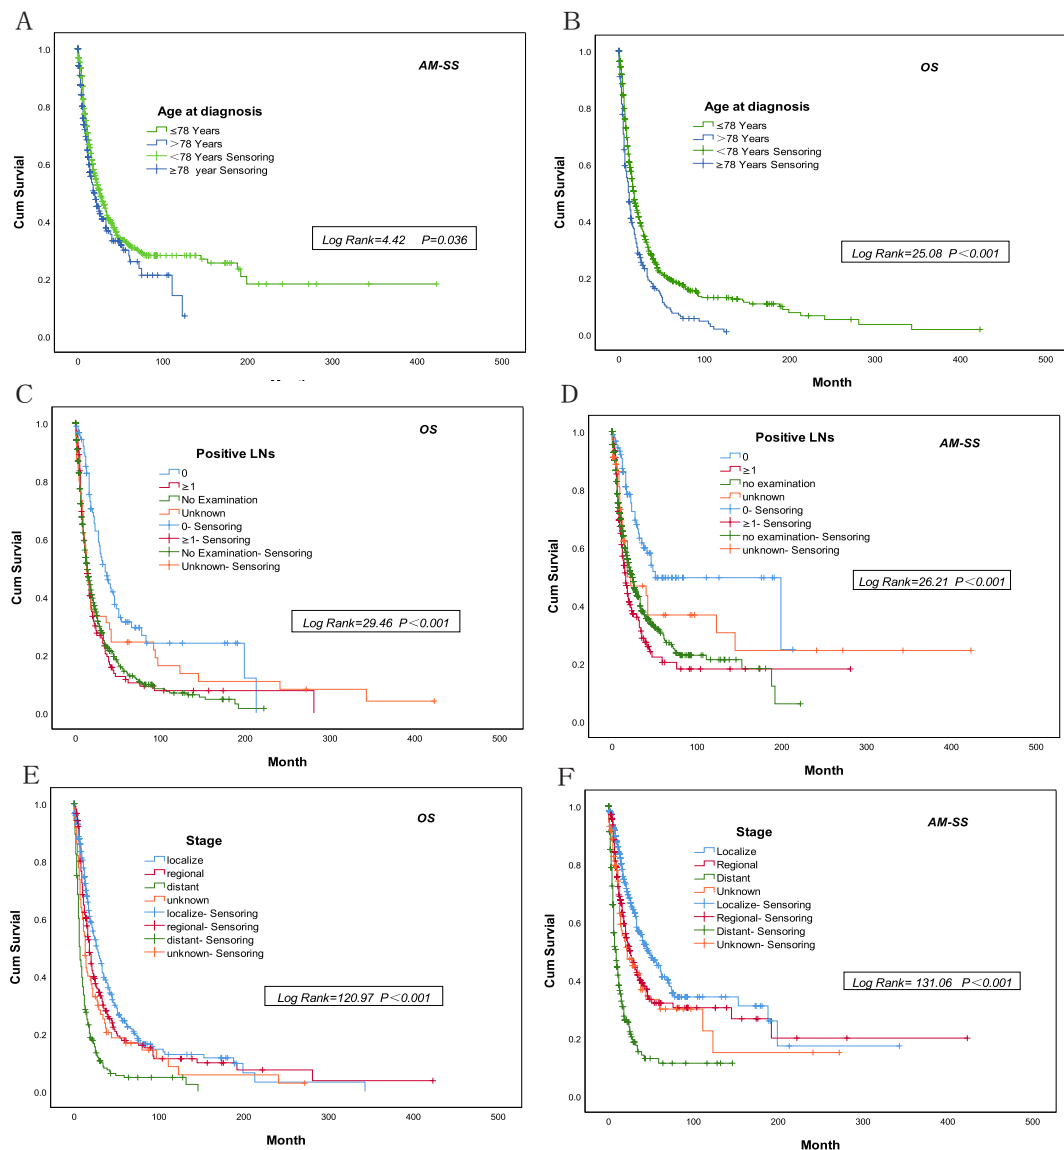

Supplementary Figure 1 Overall survival and Anorectal Melanoma-specific survival stratified by Kaplan-Meier analysis and log-rank test. A and B: Stratified according to age at diagnosis cut by X-tile software; C and D: Stratified according to Positive lymph nodes; E and F: Stratified according to stage of SEER.
