# Supplementary material
Source: HighWire-hosted journal article supplement (https://bmjopen.bmj.com/content/12/4/e053339)
Supplement: inline-supplementary-material-3 [file inline-supplementary-material-3.pdf]

**Supplementary Table 2 Baseline Characteristics of surgery treatment before and after Propensity-Score Matching**

| Parameter          | Before Matching |            |         | After Matching |            |         |
|--------------------|-----------------|------------|---------|----------------|------------|---------|
|                    | Surgery         | No surgery | P value | Surgery        | No surgery | P value |
| Age,years          |                 |            |         |                |            |         |
| <78                | 333             | 78         | 0.024   | 75             | 68         | 0.284   |
| ≥78                | 100             | 39         |         | 27             | 34         |         |
| Sex                |                 |            |         |                |            |         |
| Male               | 172             | 48         | 0.799   | 39             | 40         | 0.885   |
| Female             | 261             | 69         |         | 63             | 62         |         |
| Race               |                 |            |         |                |            |         |
| White              | 367             | 99         | 0.337   | 91             | 85         | 0.464   |
| Black              | 24              | 10         |         | 6              | 10         |         |
| Asian              | 42              | 8          |         | 5              | 7          |         |
| Marital status     |                 |            |         |                |            |         |
| Married            | 252             | 60         | 0.076   | 39             | 55         | 0.012   |
| Never Married      | 48              | 15         |         | 7              | 11         |         |
| Previously Married | 121             | 33         |         | 52             | 29         |         |
| Unknown            | 12              | 9          |         | 4              | 7          |         |
| Location           |                 |            |         |                |            |         |
| Rectal             | 189             | 85         | 0.000   | 68             | 70         | 0.765   |
| Anal               | 244             | 32         |         | 34             | 32         |         |
| Stage              |                 |            |         |                |            |         |
| Localized          | 215             | 30         | 0.000   | 24             | 30         | 0.244   |
| Regional           | 125             | 15         |         | 24             | 15         |         |
| Distant            | 93              | 72         |         | 54             | 57         |         |
| Chemotherapy       |                 |            |         |                |            |         |
| Yes                | 76              | 36         | 0.000   | 25             | 25         | 1.000   |
| No or unknown      | 357             | 81         |         | 77             | 77         |         |
