# Supplementary material
Source: HighWire-hosted journal article supplement (https://bmjopen.bmj.com/content/12/4/e053339)
Supplement: inline-supplementary-material-4 [file inline-supplementary-material-4.pdf]

**Supplementary Table 3 Baseline Characteristics of surgery type before and after Propensity-Score Matching**

| Parameter          | Before Matching |     |         | After Matching |    |         |
|--------------------|-----------------|-----|---------|----------------|----|---------|
|                    | LS              | ES  | P value | LS             | ES | P value |
| Age,years          |                 |     |         |                |    |         |
| <78                | 198             | 112 | 0.000   | 72             | 86 | 0.005   |
| ≥78                | 84              | 11  |         | 22             | 8  |         |
| Sex                |                 |     |         |                |    |         |
| Male               | 122             | 37  | 0.012   | 58             | 60 | 0.763   |
| Female             | 160             | 86  |         | 36             | 34 |         |
| Race               |                 |     |         |                |    |         |
| White              | 243             | 102 | 0.586   | 80             | 81 | 0.584   |
| Black              | 12              | 8   |         | 7              | 4  |         |
| Asian              | 27              | 13  |         | 7              | 9  |         |
| Marital status     |                 |     |         |                |    |         |
| Married            | 158             | 77  | 0.672   | 59             | 59 | 0.901   |
| Never Married      | 32              | 12  |         | 14             | 11 |         |
| Previously Married | 83              | 31  |         | 19             | 22 |         |
| Unknown            | 9               | 3   |         | 2              | 2  |         |
| Location           |                 |     |         |                |    |         |
| Rectal             | 114             | 67  | 0.009   | 42             | 43 | 0.883   |
| Anal               | 168             | 56  |         | 52             | 51 |         |
| Stage              |                 |     |         |                |    |         |
| Localized          | 171             | 34  | 0.000   | 39             | 34 | 0.124   |
| Regional           | 56              | 60  |         | 30             | 43 |         |
| Distant            | 55              | 29  |         | 25             | 17 |         |
| Chemotherapy       |                 |     |         |                |    |         |
| Yes                | 47              | 24  | 0.000   | 19             | 16 | 0.574   |
| No or unknown      | 236             | 99  |         | 75             | 78 |         |
